# Supplementary material for: Recovery of Rare Earth Elements from Wastewater Towards a Circular Economy
Source: MDPI journal article supplement (doi:10.3390/molecules24061005), 2019-03-13
Supplement: s1 [file s1]

Supplementary data:

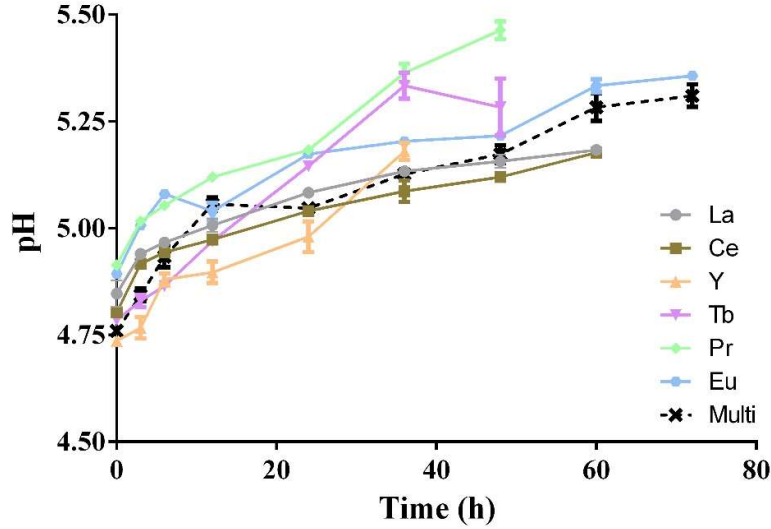

**Figure S1:** pH variation for the single and multi-solute assays with zeolite and REE, with the respective standard deviation ( $n=3$ ,  $X=2$ ).

**Table S1:** Variation of the pH for the single and multi-solute assays with bacterial biomass, with the respective standard deviation ( $n=2$ ,  $X=2$ ).

| Time | Single- component |                |                |                |                |                | Multi solute   |
|------|-------------------|----------------|----------------|----------------|----------------|----------------|----------------|
|      | La                | Ce             | Eu             | Pr             | Tb             | Y              |                |
| 0 h  | $4.9 \pm 0.12$    | $4.9 \pm 0.13$ | $5.0 \pm 0.01$ | $4.9 \pm 0.06$ | $4.9 \pm 0.15$ | $4.9 \pm 0.13$ | $5.0 \pm 0.00$ |
| 48 h | $4.9 \pm 0.10$    | $4.9 \pm 0.00$ | $5.0 \pm 0.00$ | $4.9 \pm 0.02$ | $4.9 \pm 0.04$ | $4.9 \pm 0.03$ | $5.0 \pm 0.01$ |

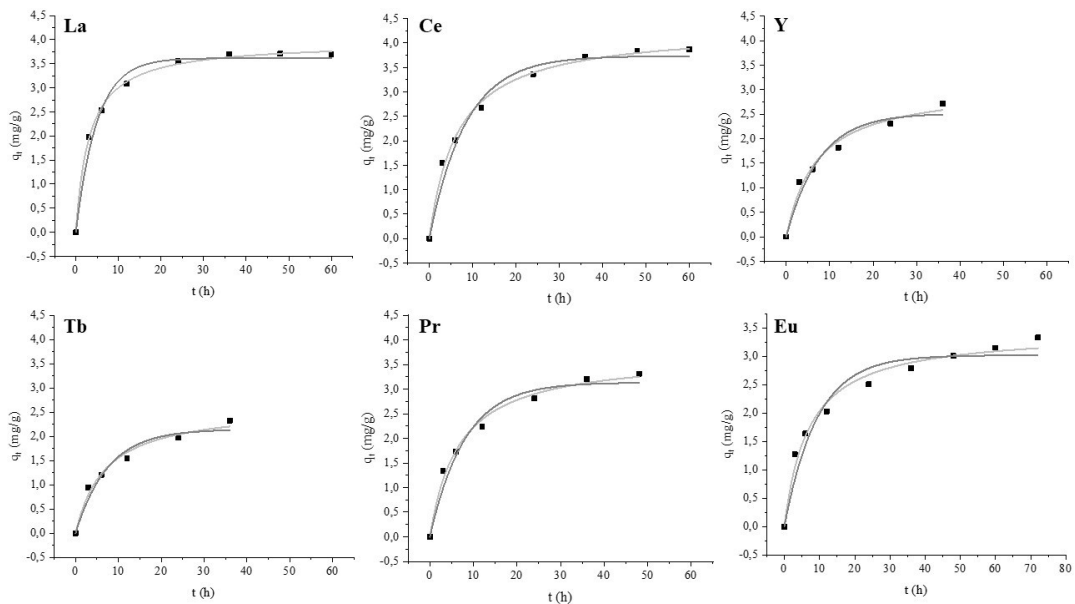

**Figure S2:** Representation of adsorption capacity at each time,  $q_t$ , versus time for each REE (■) in the single solute assay with zeolite for the PFO (—) and PSO (---) modelling ( $n=3$ ,  $X=2$ ).

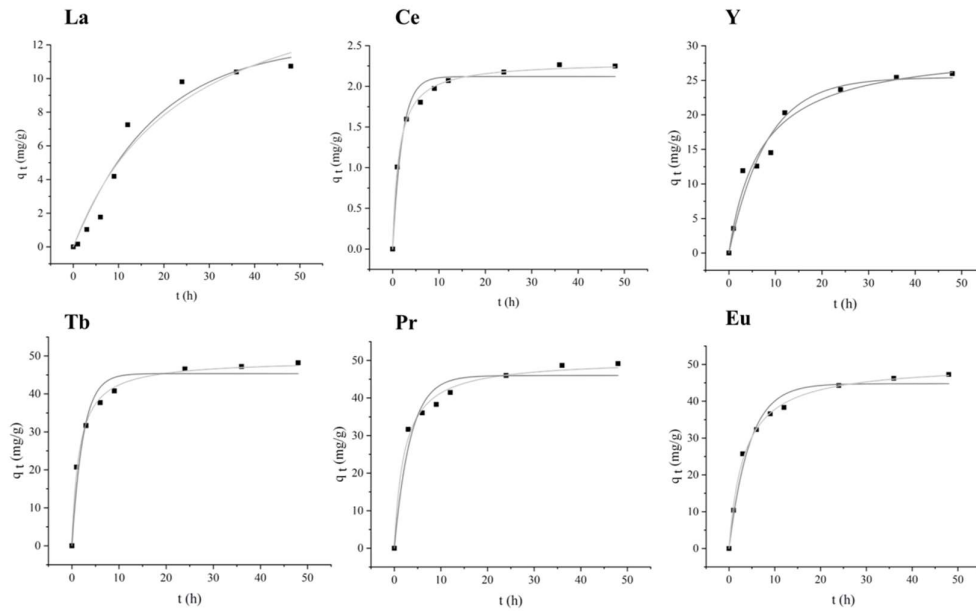

**Figure S3:** Representation of adsorption capacity at each time,  $q_t$ , versus time for each REE (■) in the single component assay with suspended biomass representing PFO (—) and PSO (---) modeling.

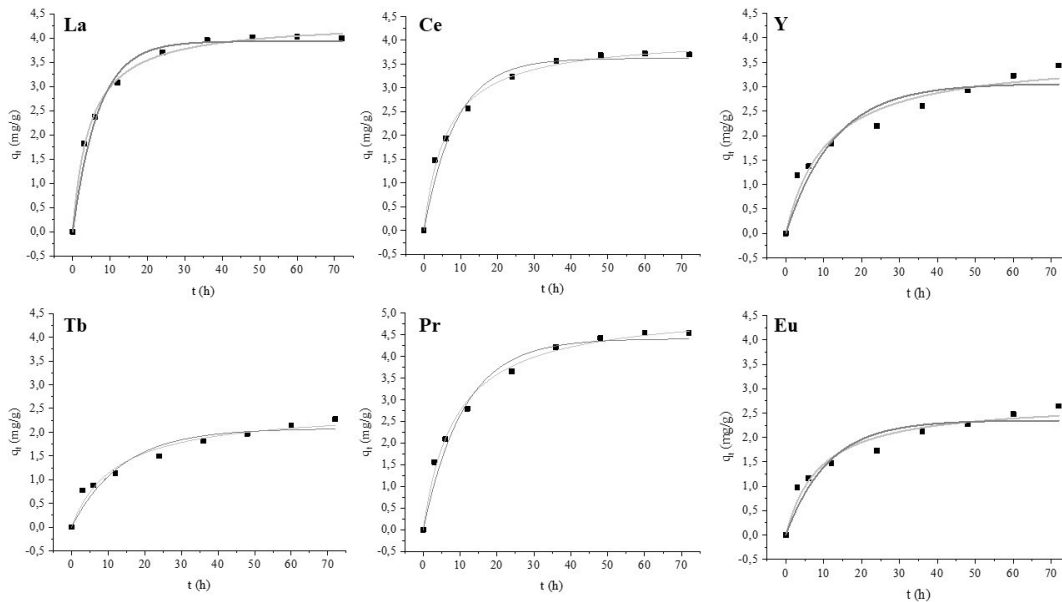

**Figure S4:** Representation of adsorption capacity at each time,  $q_t$ , versus time for each REE (■) in the multi solute assay with zeolite for the PFO (—) and PSO (---) modelling (n=3, X=2).

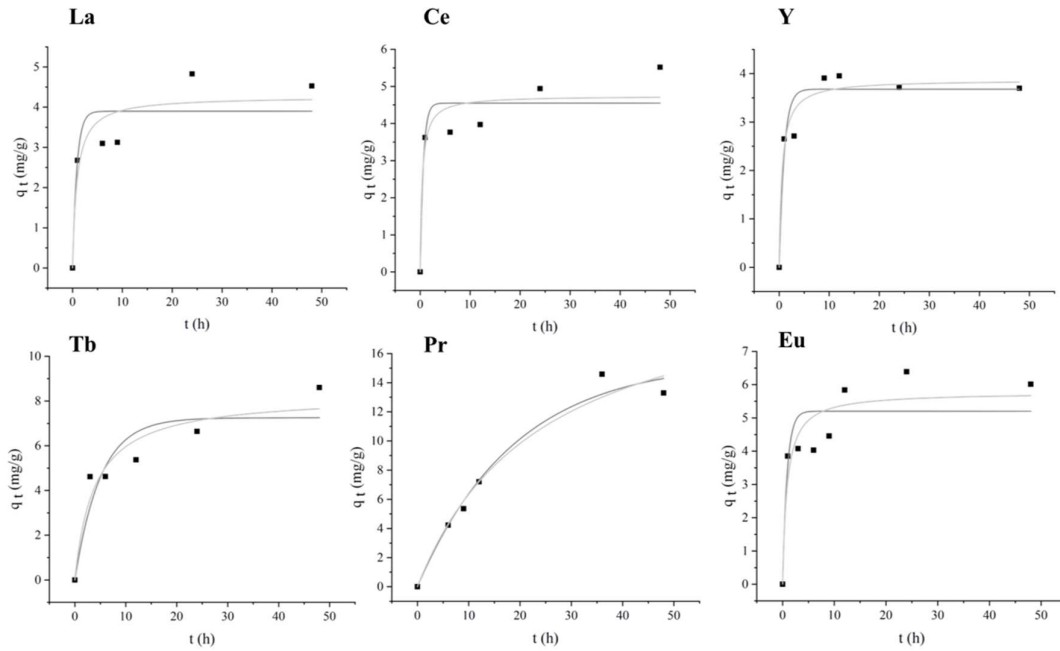

**Figure S5:** Representation of adsorption capacity at each time,  $q_t$ , versus time for each REE (■) in the multi solute component assay with suspended biomass representing PFO (—) and PSO (---) modeling.

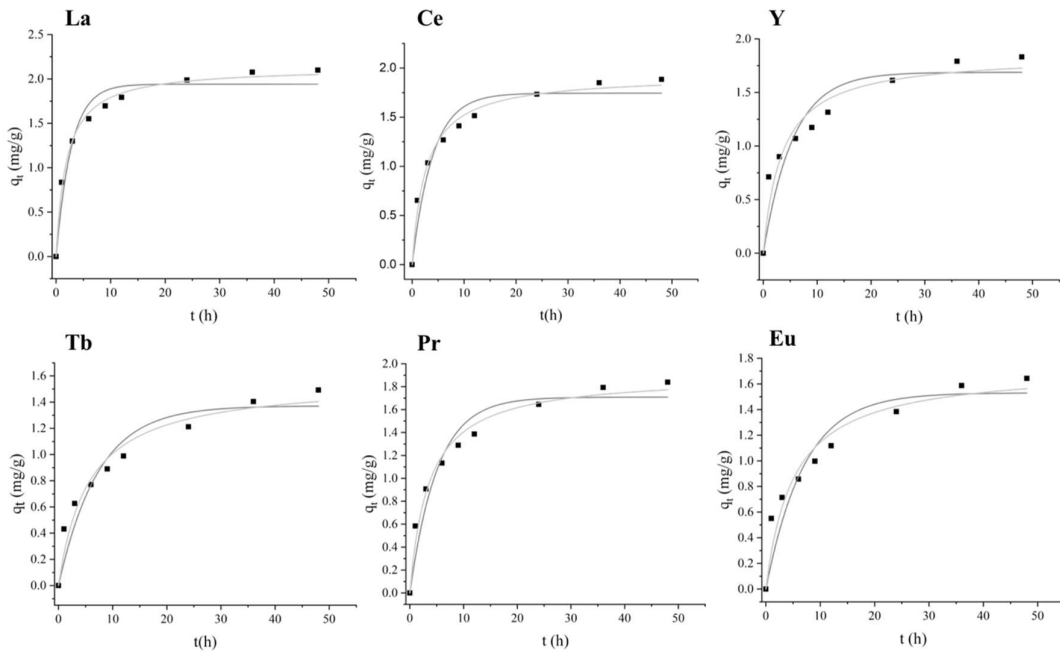

**Figure S6:** Representation of adsorption capacity at each time,  $q_t$ , versus time for each REE (■) in the multi solute component assay with supported biomass on zeolite representing PFO (—) and PSO (---) modeling.

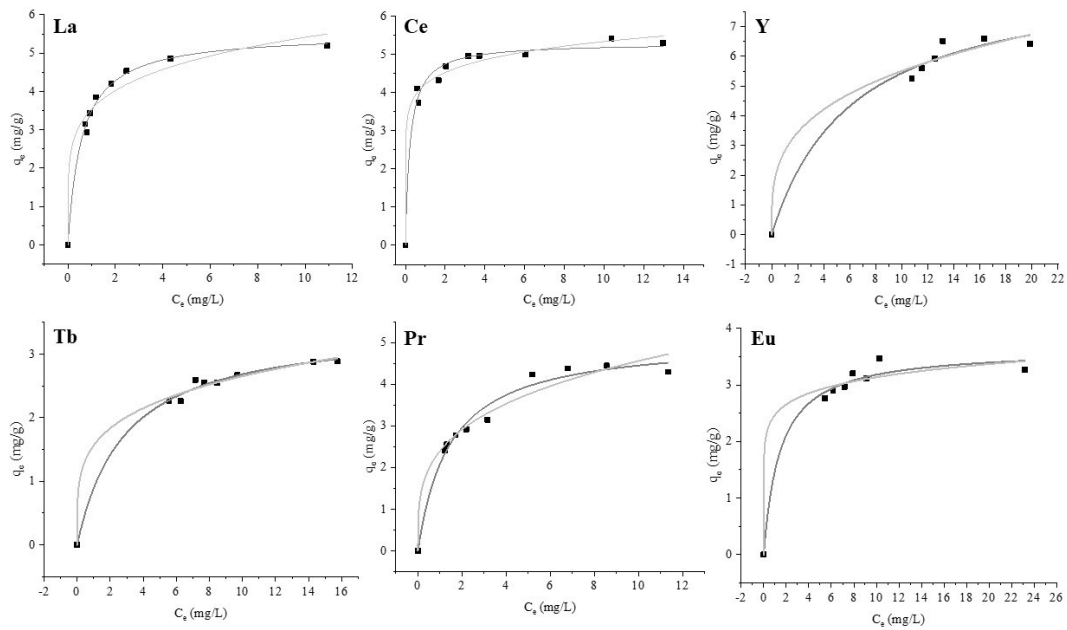

**Figure S7:** Adsorption isotherms graphs corresponding to Langmuir (—) and Freundlich (---) for the tested single solute REE assays with zeolite ( $n=3$ ,  $X=2$ ).

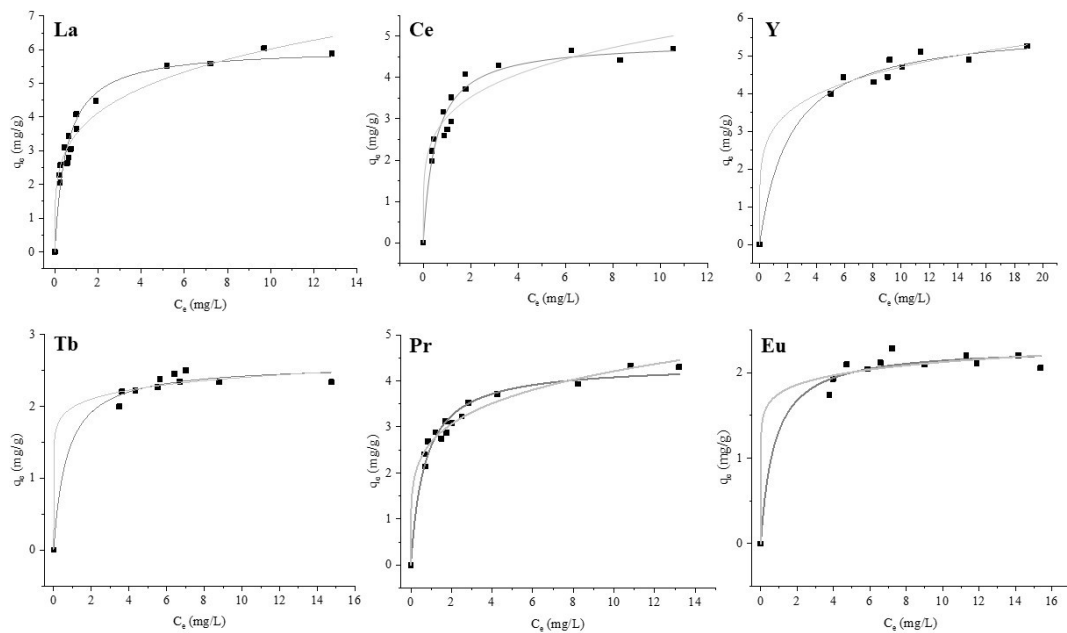

**Figure S8:** Adsorption isotherms graphs corresponding to Langmuir (—) and Freundlich (---) for the tested multi solute REE assays with zeolite ( $n=3$ ,  $X=2$ ).

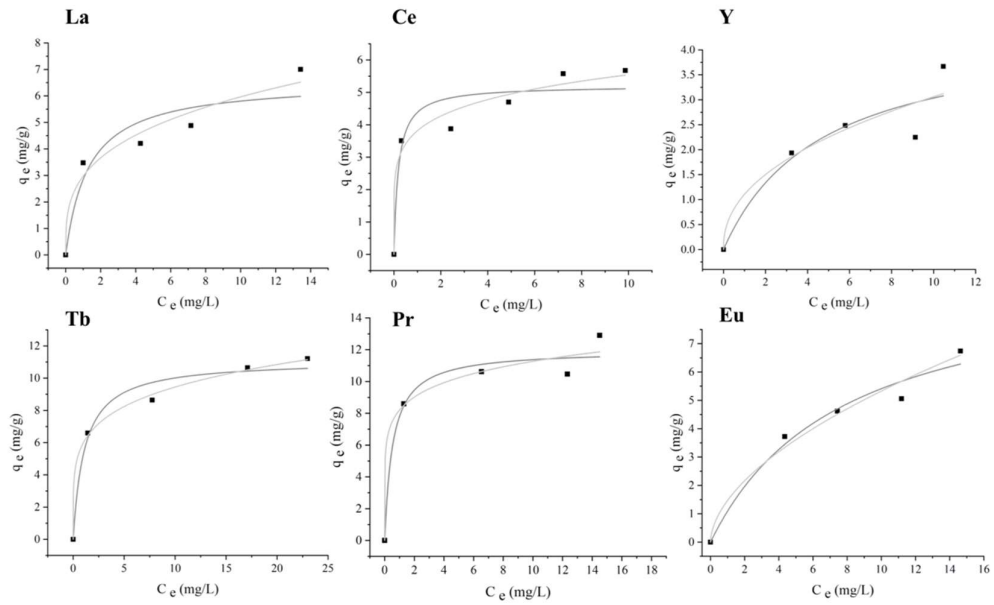

**Figure S9:** Adsorption isotherm graphs corresponding to Langmuir (—) and Freundlich (---) for the tested multiple-component REE with suspended biomass ( $n=2$ ,  $X=2$ ).

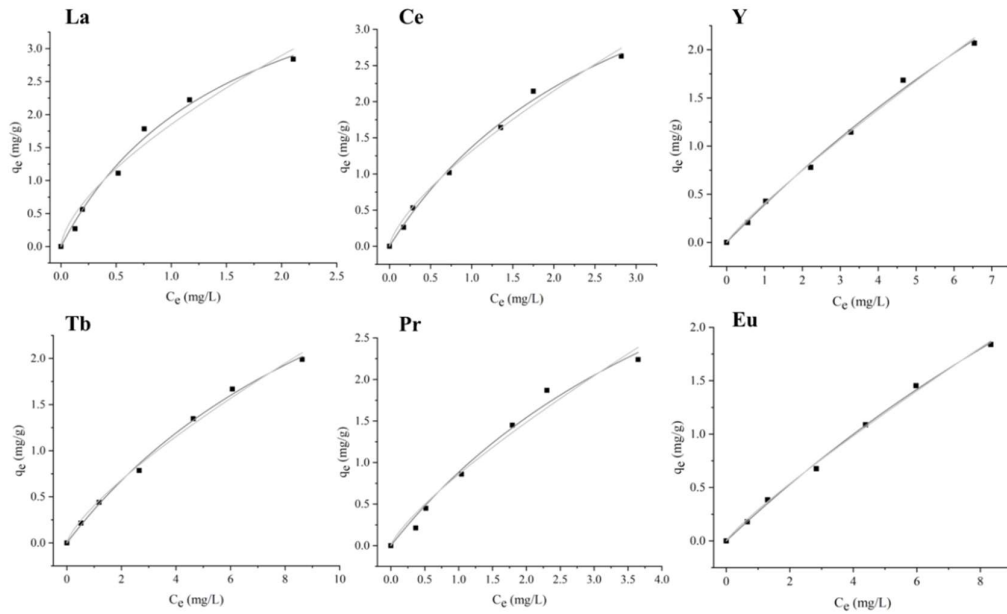

**Figure S10:** Adsorption isotherm graphs corresponding to Langmuir (—) and Freundlich (---) for the tested multiple-component REE with supported biomass on zeolite ( $n=2$ ,  $X=2$ ).

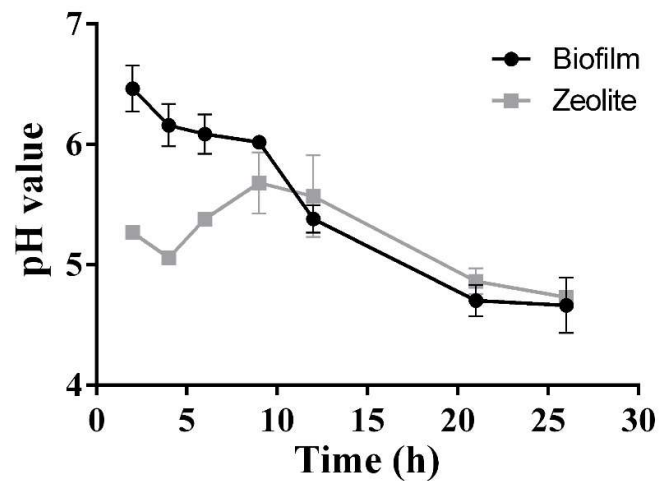

**Figure S11:** pH variation for the multi solute assays with zeolite with or without biofilm for the column assays, with the respective standard deviation (n=3, X=2).
